# Supplementary material for: Ska3 Ensures Timely Mitotic Progression by Interacting Directly With Microtubules and Ska1 Microtubule Binding Domain
Source: PubMed Central journal article supplement (PMC5036024; doi:10.1038/srep34042), 2016-09-26
Supplement: srep34042-s1.pdf [file srep34042-s1.pdf]

**Ska3 Ensures Timely Mitotic Progression by Interacting Directly With Microtubules  
and Ska1 Microtubule Binding Domain**

Maria Alba Abad<sup>1</sup>, Juan Zou<sup>1</sup>, Bethan Medina-Pritchard<sup>1</sup>, Erich, A. Nigg<sup>2</sup>, Juri Rappsilber<sup>1</sup>,  
Anna Santamaria<sup>3</sup> and A. Arockia Jeyaprkash<sup>1\*</sup>.

<sup>1</sup>*Wellcome Trust Centre for Cell Biology, University of Edinburgh, Michael Swann Building, Max  
Born Crescent, Edinburgh, EH9 3BF*

<sup>2</sup>*Biozentrum, University of Basel, Klingelbergstrasse 50/70, CH-4056 Basel, Switzerland*

<sup>3</sup>*Cell Cycle and Cancer, Group of Biomedical Research in Gynecology, Vall d'Hebron Research  
Institute, Barcelona, Spain*

Correspondence: [ajeyapra@staffmail.ed.ac.uk](mailto:ajeyapra@staffmail.ed.ac.uk)

Running title: Ska3-microtubule interactions

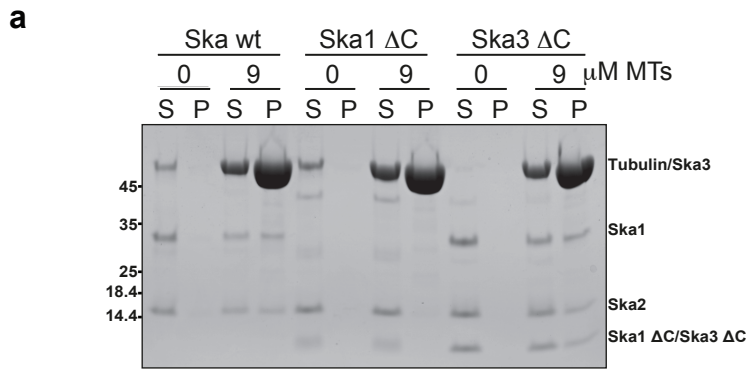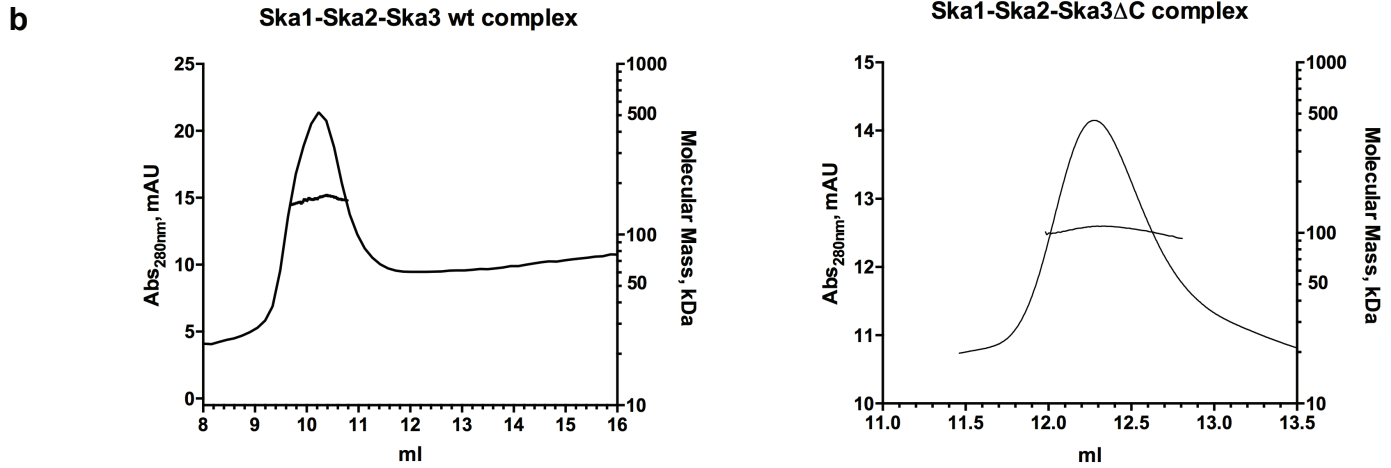

|                           | Measured MW in kDa<br>(Calculated MW) | Quaternary Structure |
|---------------------------|---------------------------------------|----------------------|
| Ska1-Ska2-Ska3            | 169kDa (180kDa)                       | Homodimer            |
| Ska1-Ska2-Ska3 $\Delta$ C | 121kDa (112kDa)                       | Homodimer            |

**Figure S1. a)** Representative SDS-PAGE gels of cosedimentation assays comparing the microtubule binding ability of the wt Ska complex, Ska1 $\Delta$ C and Ska3 $\Delta$ C as shown in **Fig. 1d**. **b)** SEC-MALS profile of the wt Ska complex (left) and Ska3 $\Delta$ C (right). The analysis shows that the deletion of the C-terminal domain of Ska3 does not alter the overall oligomeric state of the complex.

**a**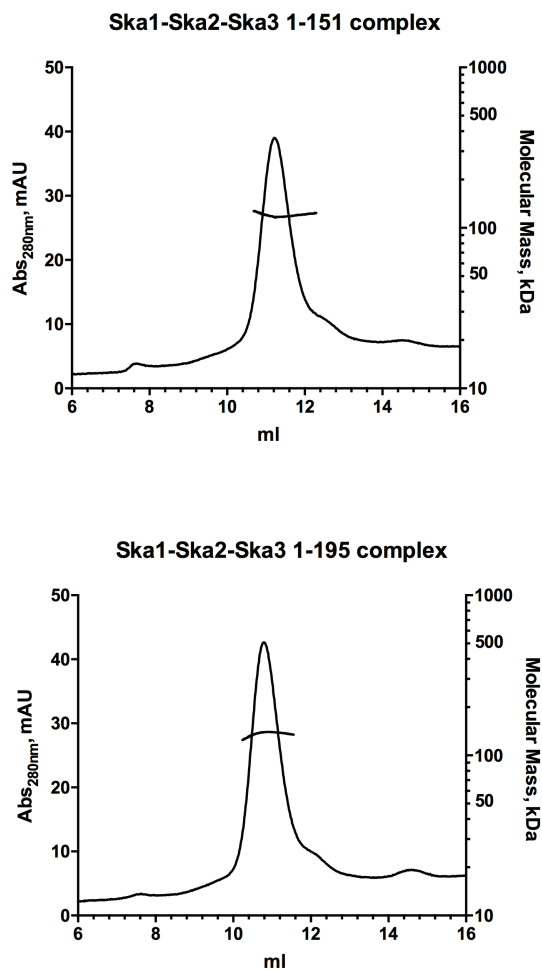

|                      | Measured MW in kDa<br>(Calculated MW) | Quaternary Structure |
|----------------------|---------------------------------------|----------------------|
| Ska1-Ska2-Ska3 1-151 | 121.8kDa (122kDa)                     | Homodimer            |
| Ska1-Ska2-Ska3 1-195 | 132.9kDa (132kDa)                     | Homodimer            |

**b**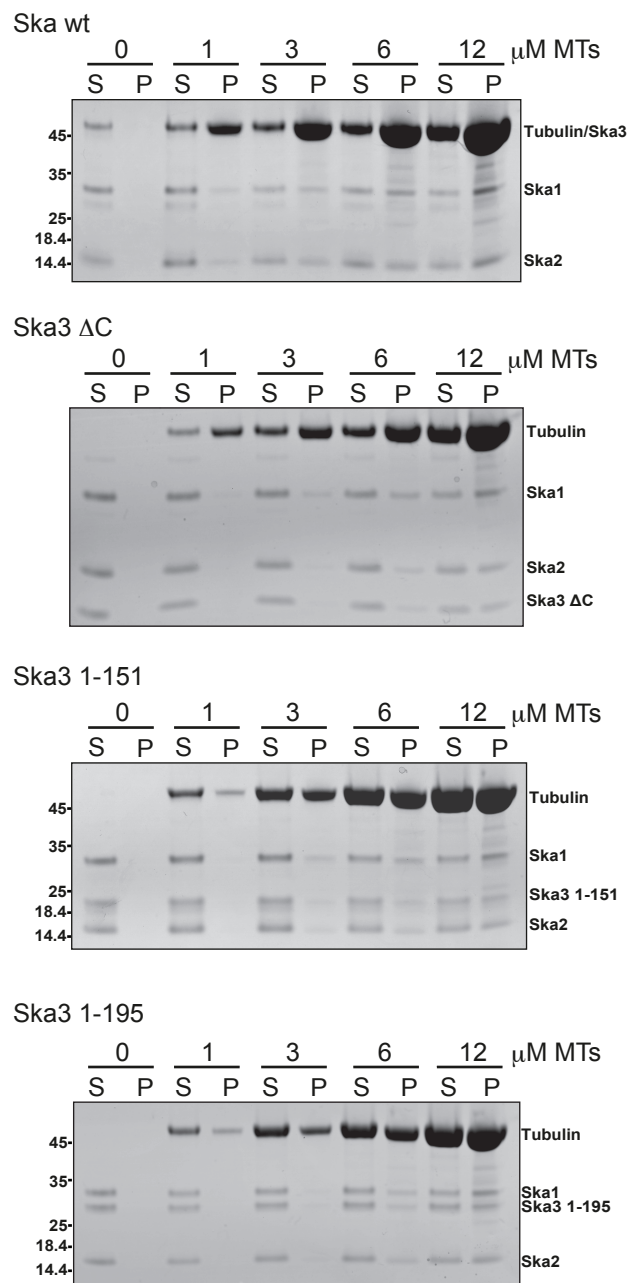**c**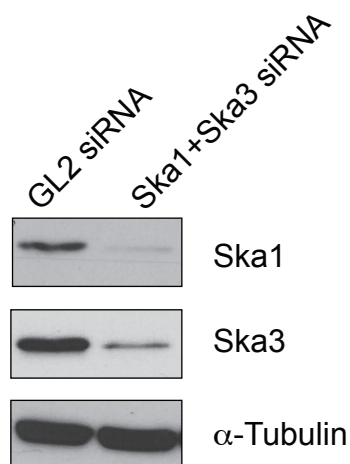

**Figure S2. a)** SEC-MALS profiles of the Ska1-Ska2-Ska3 1-151 (top) and Ska1-Ska2-Ska3 1-195 (bottom) complexes. The analysis shows that the truncations do not affect the oligomeric structure of the complex. **b)** Representative SDS-PAGE gels of cosedimentation assays comparing wt Ska complex and Ska3 $\Delta$ C with Ska1-Ska2-Ska3 1-151 and Ska1-Ska2-Ska3 1-195 as shown in **Fig. 2a**. **c)** Representative western blot showing the level of depletion obtained in HEK293T with Ska1 and Ska3 double siRNA after 72 hours of treatment.

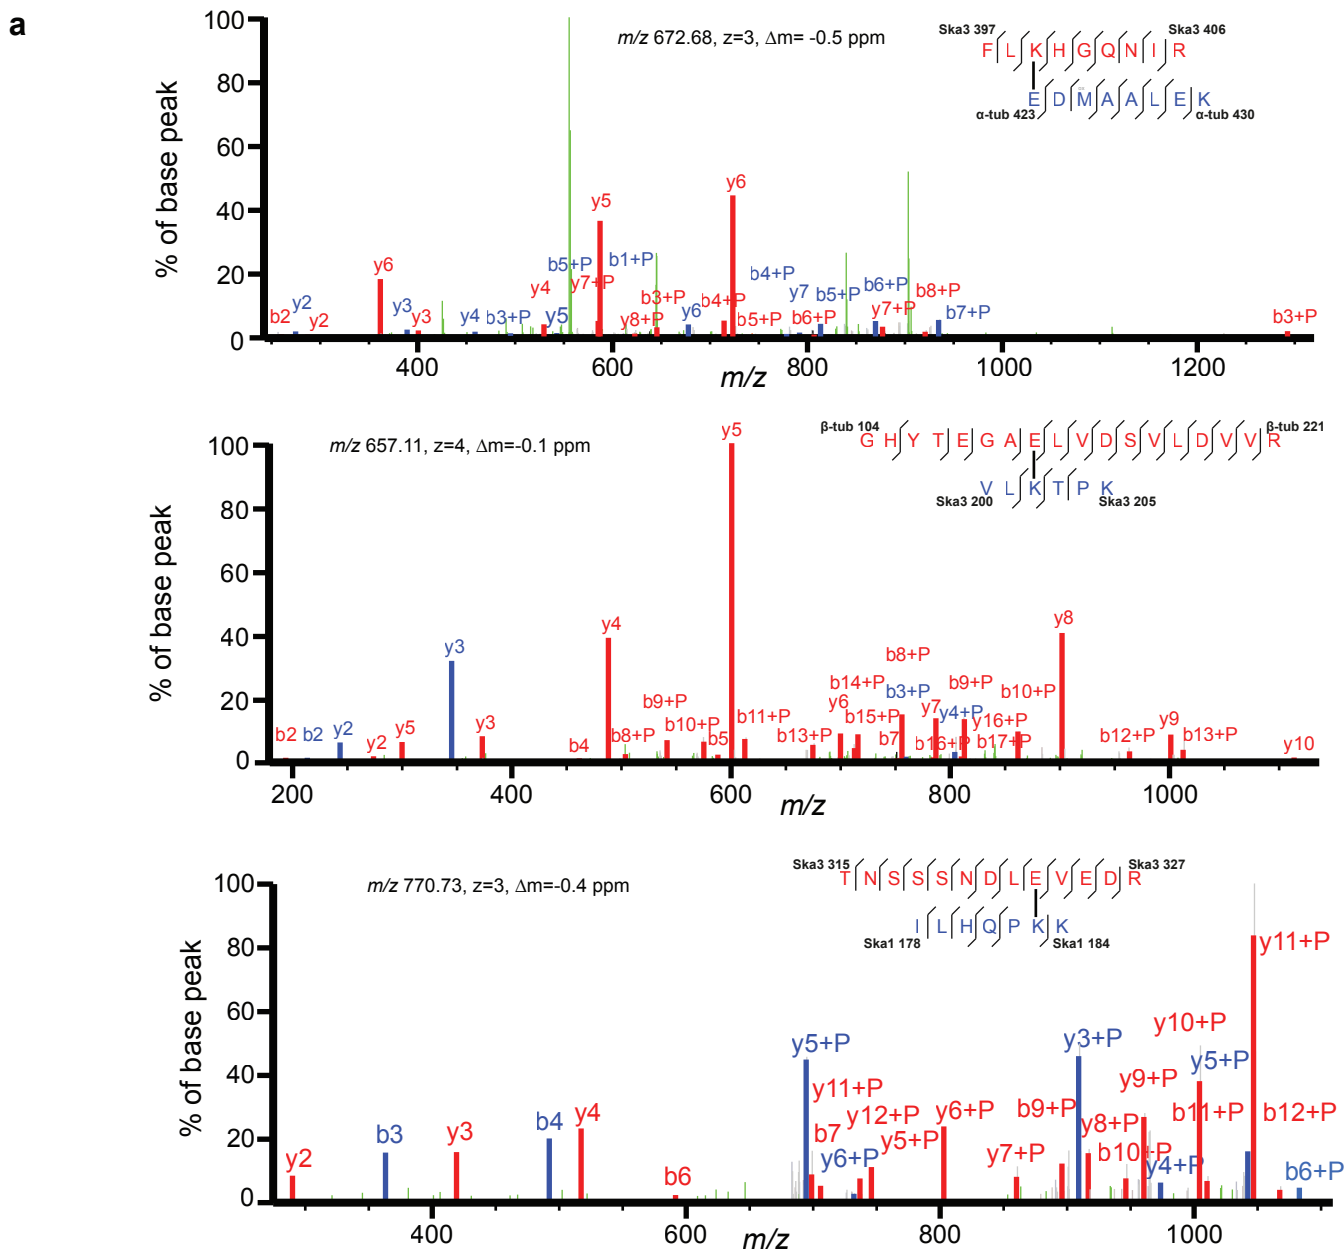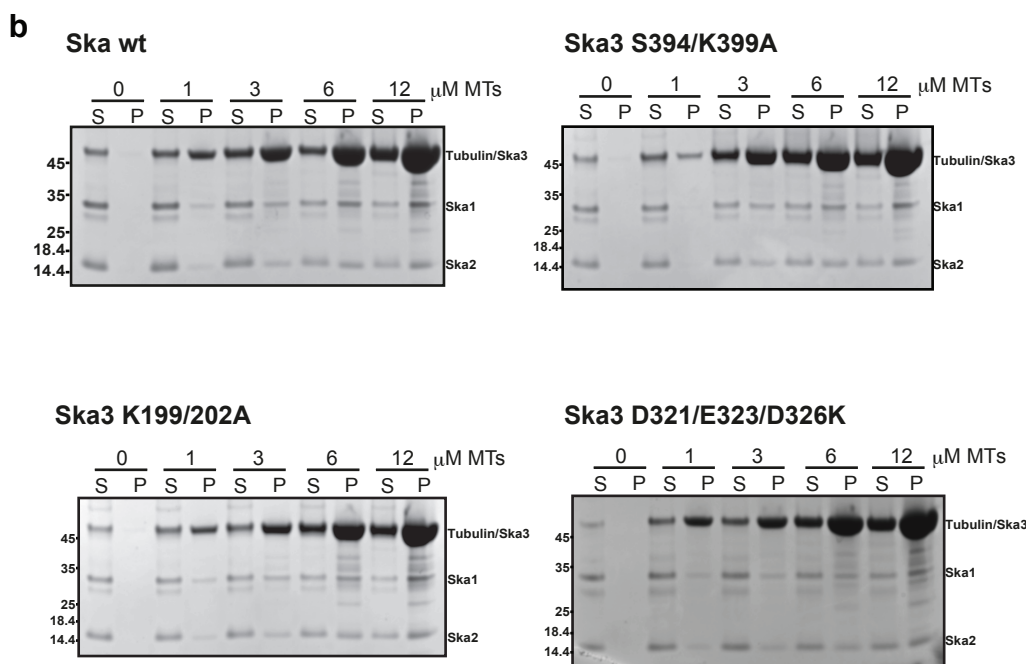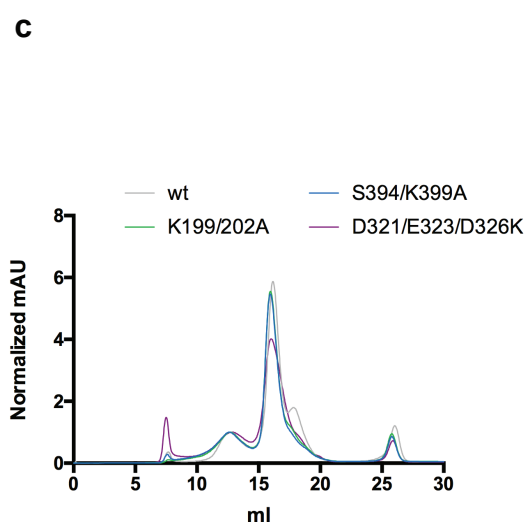

**Figure S3. a)** High resolution fragmentation spectra of a few representative cross-linked peptides. **b)** Representative SDS-PAGE gels of MT-cosedimentation assays comparing wt Ska complex and Ska3 point mutants (Ska3 K199/202A, S394/K399A and D321/E323/D326K) as shown in Fig. 3c and d. **c)** Comparison of the size exclusion chromatograms of all the mutants tested in MT-cosedimentation assays shown in Fig. 3c and d. Analysis shows that all mutants behave identically to the wt Ska complex.

|                            |   |   |   |   |   |   |   |   |   |   |
|----------------------------|---|---|---|---|---|---|---|---|---|---|
| Myc-V                      | + | - | - | - | - | + | - | - | - | - |
| Myc-Ska1                   | - | + | + | + | + | - | + | + | + | + |
| mCherry-V                  | + | - | - | - | - | + | - | - | - | - |
| mCherry-Ska3               | - | + | - | - | - | - | + | - | - | - |
| mCherry-Ska3 K199/202A     | - | - | + | - | - | - | - | + | - | - |
| mCherry-Ska3 K394/399A     | - | - | - | + | - | - | - | - | + | - |
| mCherry-Ska3 D321/323/326K | - | - | - | - | + | - | - | - | - | + |

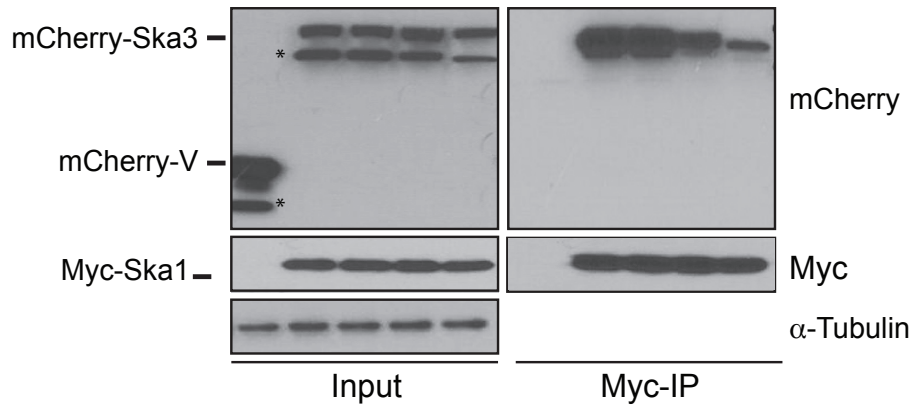

**Figure S4.** Combinations of Myc-Ska1 and mCherry-Ska3 versions as depicted in the figure were expressed in HEK-293T cells and cells were harvested after 36 hours. Myc-empty vector or Myc-Ska1 was then immunoprecipitated using anti-Myc antibodies, resolved by SDS-PAGE and co-immunoprecipitation of mCherry-Ska3 versions was resolved by Western blotting.
